# Supplementary material
Source: PubMed Central journal article supplement (PMC6393618)
Supplement: supp_RA118.004280_138584_2_supp_251263_pjrwvw.pdf [file supp_RA118.004280_138584_2_supp_251263_pjrwvw.pdf]

**Combined treatment with the phenolics (-)-epigallocatechin-3-gallate and ferulic acid improves cognition and reduces Alzheimer-like pathology in mice**

**Takashi Mori, Naoki Koyama, Jun Tan, Tatsuya Segawa, Masahiro Maeda, and Terrence Town**

| <b>APP/PS1-V</b> |                 |                       | <b>APP/PS1-EGCG</b> |                 |                       |
|------------------|-----------------|-----------------------|---------------------|-----------------|-----------------------|
|                  | <b>Training</b> | <b>Retention test</b> |                     | <b>Training</b> | <b>Retention test</b> |
| 1                | 56.522          | 42.105                | 1                   | 60.000          | 58.824                |
| 2                | 54.545          | 43.750                | 2                   | 42.857          | 57.895                |
| 3                | 45.455          | 55.000                | 3                   | 46.154          | 57.143                |
| 4                | 50.000          | 53.846                | 4                   | 60.000          | 55.556                |
| 5                | 38.889          | 44.444                | 5                   | 41.667          | 55.556                |
| 6                | 60.000          | 57.143                | 6                   | 56.250          | 63.636                |
| 7                | 42.857          | 47.368                | 7                   | 60.000          | 75.000                |
| 8                | 54.167          | 56.522                | 8                   | 47.059          | 62.500                |
| Mean             | 50.304          | 50.022                | Mean                | 51.748          | 60.764                |
| SD               | 7.319           | 6.240                 | SD                  | 8.093           | 6.473                 |

  

| <b>APP/PS1-FA</b> |                 |                       | <b>APP/PS1-EGCG/FA</b> |                 |                       |
|-------------------|-----------------|-----------------------|------------------------|-----------------|-----------------------|
|                   | <b>Training</b> | <b>Retention test</b> |                        | <b>Training</b> | <b>Retention test</b> |
| 1                 | 48.148          | 60.000                | 1                      | 43.750          | 66.667                |
| 2                 | 43.478          | 58.824                | 2                      | 50.000          | 73.913                |
| 3                 | 53.846          | 56.250                | 3                      | 57.143          | 73.333                |
| 4                 | 57.143          | 57.143                | 4                      | 57.895          | 80.000                |
| 5                 | 54.839          | 73.684                | 5                      | 56.250          | 64.000                |
| 6                 | 58.333          | 58.824                | 6                      | 52.941          | 63.636                |
| 7                 | 57.692          | 57.143                | 7                      | 40.000          | 76.471                |
| 8                 | 46.154          | 66.667                | 8                      | 56.250          | 75.000                |
| Mean              | 52.454          | 61.067                | Mean                   | 51.779          | 71.627                |
| SD                | 5.737           | 6.045                 | SD                     | 6.696           | 6.091                 |

  

| <b>WT-V</b> |                 |                       | <b>WT-EGCG</b> |                 |                       |
|-------------|-----------------|-----------------------|----------------|-----------------|-----------------------|
|             | <b>Training</b> | <b>Retention test</b> |                | <b>Training</b> | <b>Retention test</b> |
| 1           | 56.250          | 73.333                | 1              | 52.632          | 76.190                |
| 2           | 53.125          | 66.667                | 2              | 56.250          | 68.421                |
| 3           | 51.613          | 63.636                | 3              | 53.333          | 66.667                |
| 4           | 42.857          | 70.588                | 4              | 60.000          | 64.000                |
| 5           | 57.143          | 69.565                | 5              | 45.455          | 78.947                |
| 6           | 52.174          | 72.222                | 6              | 55.556          | 68.182                |
| 7           | 41.667          | 73.333                | 7              | 44.444          | 77.778                |
| 8           | 54.167          | 82.353                | 8              | 43.750          | 68.182                |
| Mean        | 51.124          | 71.462                | Mean           | 51.427          | 71.046                |
| SD          | 5.793           | 5.54                  | SD             | 6.121           | 5.69                  |

  

| <b>WT-FA</b> |                 |                       | <b>WT-EGCG/FA</b> |                 |                       |
|--------------|-----------------|-----------------------|-------------------|-----------------|-----------------------|
|              | <b>Training</b> | <b>Retention test</b> |                   | <b>Training</b> | <b>Retention test</b> |
| 1            | 56.522          | 76.000                | 1                 | 56.250          | 73.333                |
| 2            | 51.429          | 75.000                | 2                 | 51.515          | 71.429                |
| 3            | 55.556          | 73.913                | 3                 | 42.857          | 68.182                |
| 4            | 56.000          | 60.000                | 4                 | 57.143          | 77.778                |
| 5            | 52.381          | 78.571                | 5                 | 47.059          | 63.158                |
| 6            | 45.455          | 69.565                | 6                 | 44.444          | 71.429                |
| 7            | 42.857          | 71.429                | 7                 | 63.636          | 63.636                |
| 8            | 42.105          | 66.667                | 8                 | 50.000          | 80.000                |
| Mean         | 50.288          | 71.393                | Mean              | 51.613          | 71.118                |
| SD           | 5.982           | 5.947                 | SD                | 7.051           | 6.051                 |

Table S1 (Supporting information of Figure 1A)

**APP/PS1-V**

|      | Number of arms entered | Alternation (%) |
|------|------------------------|-----------------|
| 1    | 46                     | 34.091          |
| 2    | 45                     | 37.209          |
| 3    | 53                     | 47.059          |
| 4    | 47                     | 53.333          |
| 5    | 61                     | 40.678          |
| 6    | 43                     | 41.463          |
| 7    | 47                     | 40.000          |
| 8    | 44                     | 38.095          |
| Mean | 48.250                 | 41.491          |
| SD   | 5.970                  | 6.080           |

**APP/PS1-EGCG**

|      | Number of arms entered | Alternation (%) |
|------|------------------------|-----------------|
| 1    | 32                     | 60.000          |
| 2    | 41                     | 58.974          |
| 3    | 38                     | 52.778          |
| 4    | 47                     | 51.111          |
| 5    | 33                     | 61.290          |
| 6    | 46                     | 50.000          |
| 7    | 38                     | 41.667          |
| 8    | 37                     | 57.143          |
| Mean | 39.000                 | 54.120          |
| SD   | 5.451                  | 6.564           |

**APP/PS1-FA**

|      | Number of arms entered | Alternation (%) |
|------|------------------------|-----------------|
| 1    | 42                     | 47.500          |
| 2    | 31                     | 51.724          |
| 3    | 38                     | 52.778          |
| 4    | 42                     | 45.000          |
| 5    | 35                     | 57.576          |
| 6    | 39                     | 48.649          |
| 7    | 46                     | 63.636          |
| 8    | 34                     | 53.125          |
| Mean | 38.375                 | 52.498          |
| SD   | 4.926                  | 5.939           |

**APP/PS1-EGCG/FA**

|      | Number of arms entered | Alternation (%) |
|------|------------------------|-----------------|
| 1    | 30                     | 60.714          |
| 2    | 22                     | 75.000          |
| 3    | 29                     | 62.963          |
| 4    | 23                     | 76.190          |
| 5    | 28                     | 73.077          |
| 6    | 29                     | 66.667          |
| 7    | 39                     | 62.162          |
| 8    | 32                     | 63.333          |
| Mean | 29.000                 | 67.513          |
| SD   | 5.292                  | 6.280           |

**WT-V**

|      | Number of arms entered | Alternation (%) |
|------|------------------------|-----------------|
| 1    | 26                     | 70.833          |
| 2    | 27                     | 72.000          |
| 3    | 30                     | 71.429          |
| 4    | 31                     | 62.069          |
| 5    | 25                     | 65.217          |
| 6    | 37                     | 71.429          |
| 7    | 30                     | 53.571          |
| 8    | 20                     | 72.222          |
| Mean | 28.250                 | 67.346          |
| SD   | 5.007                  | 6.687           |

**WT-EGCG**

|      | Number of arms entered | Alternation (%) |
|------|------------------------|-----------------|
| 1    | 28                     | 73.077          |
| 2    | 31                     | 62.069          |
| 3    | 33                     | 67.742          |
| 4    | 21                     | 78.947          |
| 5    | 20                     | 72.222          |
| 6    | 24                     | 72.727          |
| 7    | 34                     | 59.375          |
| 8    | 36                     | 64.706          |
| Mean | 28.375                 | 68.858          |
| SD   | 6.116                  | 6.551           |

**WT-FA**

|      | Number of arms entered | Alternation (%) |
|------|------------------------|-----------------|
| 1    | 27                     | 64.000          |
| 2    | 38                     | 69.444          |
| 3    | 34                     | 59.375          |
| 4    | 28                     | 73.077          |
| 5    | 27                     | 64.000          |
| 6    | 25                     | 52.174          |
| 7    | 18                     | 75.000          |
| 8    | 31                     | 72.414          |
| Mean | 28.500                 | 66.186          |
| SD   | 6.024                  | 7.809           |

**WT-EGCG/FA**

|      | Number of arms entered | Alternation (%) |
|------|------------------------|-----------------|
| 1    | 23                     | 71.429          |
| 2    | 34                     | 56.250          |
| 3    | 22                     | 70.000          |
| 4    | 25                     | 78.261          |
| 5    | 32                     | 70.000          |
| 6    | 33                     | 77.419          |
| 7    | 34                     | 71.875          |
| 8    | 35                     | 63.636          |
| Mean | 29.750                 | 69.859          |
| SD   | 5.445                  | 7.154           |

**Errors****APP/PS1-V****Day 1****Day 2**

|      | <b>1</b> | <b>2</b> | <b>3</b> | <b>4</b> | <b>5</b> | <b>6</b> | <b>7</b> | <b>8</b> | <b>9</b> | <b>10</b> |
|------|----------|----------|----------|----------|----------|----------|----------|----------|----------|-----------|
| 1    | 4.667    | 3.333    | 5.667    | 2.333    | 4.000    | 3.667    | 3.667    | 3.667    | 2.667    | 3.000     |
| 2    | 5.000    | 2.667    | 6.333    | 4.667    | 5.000    | 4.667    | 4.667    | 3.667    | 3.000    | 4.000     |
| 3    | 3.000    | 4.333    | 5.333    | 6.333    | 3.667    | 4.667    | 4.333    | 6.000    | 6.000    | 5.000     |
| 4    | 4.000    | 3.667    | 3.667    | 3.333    | 3.000    | 4.000    | 4.000    | 4.000    | 5.000    | 3.667     |
| 5    | 10.333   | 4.000    | 3.667    | 2.667    | 4.333    | 4.333    | 3.333    | 3.333    | 5.000    | 5.333     |
| 6    | 4.333    | 9.667    | 3.000    | 3.333    | 3.333    | 5.000    | 4.667    | 4.333    | 4.333    | 2.000     |
| 7    | 4.667    | 5.000    | 3.333    | 5.333    | 3.000    | 4.000    | 3.667    | 3.333    | 4.000    | 6.667     |
| 8    | 7.667    | 4.333    | 3.000    | 6.667    | 7.333    | 7.333    | 8.667    | 5.333    | 2.333    | 4.333     |
| Mean | 5.458    | 4.625    | 4.250    | 4.333    | 4.208    | 4.708    | 4.625    | 4.208    | 4.042    | 4.250     |
| SD   | 2.377    | 2.156    | 1.318    | 1.662    | 1.436    | 1.147    | 1.704    | 0.975    | 1.290    | 1.445     |

**APP/PS1-EGCG****Day 1****Day 2**

|      | <b>1</b> | <b>2</b> | <b>3</b> | <b>4</b> | <b>5</b> | <b>6</b> | <b>7</b> | <b>8</b> | <b>9</b> | <b>10</b> |
|------|----------|----------|----------|----------|----------|----------|----------|----------|----------|-----------|
| 1    | 2.333    | 1.000    | 2.000    | 1.333    | 3.000    | 3.333    | 2.333    | 2.333    | 3.333    | 1.667     |
| 2    | 7.333    | 6.667    | 2.333    | 2.667    | 1.333    | 2.667    | 2.667    | 1.667    | 0.667    | 0.667     |
| 3    | 4.333    | 5.000    | 3.000    | 3.000    | 1.667    | 6.000    | 3.667    | 3.667    | 3.333    | 3.000     |
| 4    | 5.000    | 4.000    | 5.333    | 4.667    | 3.333    | 6.333    | 5.333    | 3.000    | 3.333    | 1.667     |
| 5    | 5.333    | 4.000    | 3.667    | 3.000    | 4.667    | 3.667    | 2.333    | 4.667    | 2.667    | 3.667     |
| 6    | 2.000    | 2.333    | 4.333    | 1.667    | 2.000    | 3.000    | 4.667    | 0.667    | 1.333    | 2.333     |
| 7    | 5.333    | 4.667    | 3.667    | 4.333    | 4.000    | 2.333    | 3.333    | 4.000    | 2.667    | 0.667     |
| 8    | 4.333    | 4.333    | 3.333    | 3.667    | 2.667    | 2.333    | 3.667    | 2.000    | 2.000    | 5.000     |
| Mean | 4.500    | 4.000    | 3.458    | 3.042    | 2.833    | 3.708    | 3.500    | 2.750    | 2.417    | 2.333     |
| SD   | 1.718    | 1.709    | 1.068    | 1.174    | 1.155    | 1.588    | 1.084    | 1.330    | 1.004    | 1.501     |

**APP/PS1-FA****Day 1****Day 2**

|      | <b>1</b> | <b>2</b> | <b>3</b> | <b>4</b> | <b>5</b> | <b>6</b> | <b>7</b> | <b>8</b> | <b>9</b> | <b>10</b> |
|------|----------|----------|----------|----------|----------|----------|----------|----------|----------|-----------|
| 1    | 3.667    | 3.333    | 3.000    | 5.333    | 2.000    | 3.000    | 3.333    | 3.000    | 3.333    | 4.000     |
| 2    | 2.667    | 2.667    | 1.667    | 2.667    | 3.667    | 3.333    | 2.667    | 3.667    | 3.333    | 2.000     |
| 3    | 8.333    | 5.333    | 4.667    | 3.333    | 1.667    | 4.667    | 3.333    | 4.000    | 3.667    | 3.000     |
| 4    | 3.333    | 3.333    | 3.667    | 3.333    | 1.333    | 4.333    | 3.000    | 0.667    | 1.333    | 1.000     |
| 5    | 3.667    | 2.000    | 1.667    | 1.667    | 1.333    | 2.667    | 1.333    | 2.000    | 1.333    | 1.000     |
| 6    | 5.667    | 4.333    | 5.000    | 2.333    | 3.000    | 2.333    | 2.333    | 3.000    | 0.000    | 3.667     |
| 7    | 3.667    | 5.000    | 3.667    | 4.667    | 6.000    | 5.000    | 6.000    | 5.000    | 4.333    | 4.000     |
| 8    | 5.333    | 7.333    | 6.000    | 2.000    | 2.333    | 3.667    | 3.000    | 1.333    | 3.667    | 1.333     |
| Mean | 4.542    | 4.167    | 3.667    | 3.167    | 2.667    | 3.625    | 3.125    | 2.833    | 2.625    | 2.500     |
| SD   | 1.834    | 1.709    | 1.543    | 1.285    | 1.574    | 0.967    | 1.333    | 1.436    | 1.527    | 1.321     |

**APP/PS1-EGCG/FA****Day 1****Day 2**

|      | <b>1</b> | <b>2</b> | <b>3</b> | <b>4</b> | <b>5</b> | <b>6</b> | <b>7</b> | <b>8</b> | <b>9</b> | <b>10</b> |
|------|----------|----------|----------|----------|----------|----------|----------|----------|----------|-----------|
| 1    | 1.333    | 3.333    | 4.000    | 2.000    | 0.667    | 3.667    | 1.000    | 0.667    | 2.667    | 1.667     |
| 2    | 3.333    | 2.000    | 1.333    | 3.000    | 1.333    | 3.000    | 2.000    | 0.667    | 2.333    | 2.000     |
| 3    | 5.333    | 2.667    | 1.667    | 1.667    | 2.333    | 2.333    | 1.667    | 3.333    | 3.000    | 3.000     |
| 4    | 5.000    | 3.333    | 1.667    | 5.000    | 1.000    | 3.000    | 3.667    | 3.000    | 3.000    | 3.333     |
| 5    | 2.333    | 2.000    | 4.667    | 2.000    | 3.667    | 3.000    | 2.000    | 0.667    | 0.333    | 1.000     |
| 6    | 6.000    | 6.667    | 4.667    | 3.000    | 4.000    | 2.333    | 3.667    | 4.333    | 1.000    | 3.000     |
| 7    | 6.333    | 4.333    | 3.000    | 3.333    | 4.000    | 6.333    | 5.333    | 4.000    | 3.333    | 2.000     |
| 8    | 5.333    | 5.667    | 4.667    | 4.333    | 4.667    | 3.333    | 3.667    | 2.667    | 2.000    | 0.667     |
| Mean | 4.375    | 3.750    | 3.208    | 3.042    | 2.708    | 3.375    | 2.875    | 2.417    | 2.208    | 2.083     |
| SD   | 1.821    | 1.697    | 1.479    | 1.174    | 1.568    | 1.278    | 1.436    | 1.540    | 1.053    | 0.972     |

**Errors****WT-V**

|      | <b>Day 1</b> |          |          |          |          | <b>Day 2</b> |          |          |          |           |
|------|--------------|----------|----------|----------|----------|--------------|----------|----------|----------|-----------|
|      | <b>1</b>     | <b>2</b> | <b>3</b> | <b>4</b> | <b>5</b> | <b>6</b>     | <b>7</b> | <b>8</b> | <b>9</b> | <b>10</b> |
| 1    | 3.333        | 2.000    | 3.333    | 1.667    | 2.000    | 2.333        | 2.667    | 1.333    | 2.333    | 2.667     |
| 2    | 3.333        | 1.667    | 1.333    | 3.667    | 3.000    | 5.333        | 2.000    | 2.000    | 3.667    | 1.667     |
| 3    | 3.333        | 5.667    | 3.000    | 3.000    | 4.000    | 5.000        | 5.333    | 3.667    | 3.667    | 3.000     |
| 4    | 2.333        | 7.333    | 2.000    | 3.333    | 2.667    | 2.333        | 2.333    | 4.667    | 3.667    | 3.333     |
| 5    | 1.667        | 3.667    | 2.333    | 1.000    | 2.333    | 5.333        | 1.667    | 3.333    | 1.667    | 1.667     |
| 6    | 5.667        | 4.333    | 3.667    | 1.333    | 0.333    | 2.000        | 2.667    | 1.333    | 1.333    | 1.000     |
| 7    | 7.667        | 2.667    | 5.667    | 3.667    | 2.667    | 4.333        | 3.333    | 5.000    | 2.333    | 3.333     |
| 8    | 6.333        | 2.000    | 2.333    | 4.667    | 3.333    | 2.333        | 2.000    | 2.000    | 2.333    | 2.333     |
| Mean | 4.208        | 3.667    | 2.958    | 2.792    | 2.542    | 3.625        | 2.750    | 2.917    | 2.625    | 2.375     |
| SD   | 2.100        | 2.016    | 1.327    | 1.309    | 1.083    | 1.506        | 1.165    | 1.456    | 0.933    | 0.863     |

**WT-EGCG**

|      | <b>Day 1</b> |          |          |          |          | <b>Day 2</b> |          |          |          |           |
|------|--------------|----------|----------|----------|----------|--------------|----------|----------|----------|-----------|
|      | <b>1</b>     | <b>2</b> | <b>3</b> | <b>4</b> | <b>5</b> | <b>6</b>     | <b>7</b> | <b>8</b> | <b>9</b> | <b>10</b> |
| 1    | 3.667        | 3.333    | 2.333    | 3.333    | 1.333    | 4.667        | 3.667    | 3.000    | 2.000    | 3.667     |
| 2    | 5.333        | 6.000    | 2.667    | 3.000    | 2.667    | 3.333        | 3.333    | 2.667    | 4.333    | 2.333     |
| 3    | 6.667        | 5.333    | 7.000    | 3.667    | 3.667    | 5.000        | 5.333    | 4.667    | 5.333    | 5.333     |
| 4    | 3.333        | 4.333    | 4.333    | 4.333    | 4.000    | 5.000        | 4.000    | 2.667    | 1.333    | 1.667     |
| 5    | 4.667        | 2.667    | 2.333    | 1.333    | 3.000    | 2.000        | 2.000    | 3.333    | 1.000    | 0.667     |
| 6    | 3.000        | 4.667    | 3.667    | 2.333    | 3.333    | 4.000        | 1.667    | 2.000    | 3.000    | 0.667     |
| 7    | 4.000        | 2.667    | 1.667    | 2.000    | 1.333    | 3.000        | 2.333    | 1.667    | 1.667    | 1.000     |
| 8    | 5.333        | 1.667    | 2.000    | 4.667    | 3.667    | 3.333        | 2.667    | 2.333    | 2.667    | 2.000     |
| Mean | 4.500        | 3.833    | 3.250    | 3.083    | 2.875    | 3.792        | 3.125    | 2.792    | 2.667    | 2.167     |
| SD   | 1.234        | 1.491    | 1.753    | 1.151    | 1.038    | 1.068        | 1.208    | 0.925    | 1.512    | 1.623     |

**APP/PS1-FA**

|      | <b>Day 1</b> |          |          |          |          | <b>Day 2</b> |          |          |          |           |
|------|--------------|----------|----------|----------|----------|--------------|----------|----------|----------|-----------|
|      | <b>1</b>     | <b>2</b> | <b>3</b> | <b>4</b> | <b>5</b> | <b>6</b>     | <b>7</b> | <b>8</b> | <b>9</b> | <b>10</b> |
| 1    | 2.333        | 2.667    | 2.000    | 2.000    | 1.333    | 3.333        | 2.000    | 4.000    | 1.333    | 1.000     |
| 2    | 6.000        | 4.333    | 4.333    | 2.333    | 5.333    | 4.000        | 3.667    | 2.000    | 2.333    | 2.667     |
| 3    | 3.667        | 2.000    | 1.667    | 2.667    | 1.667    | 2.333        | 3.000    | 2.000    | 2.000    | 1.667     |
| 4    | 2.333        | 1.667    | 3.000    | 1.667    | 2.333    | 3.333        | 0.667    | 2.000    | 1.667    | 3.667     |
| 5    | 3.667        | 4.667    | 0.667    | 3.333    | 4.000    | 1.667        | 1.667    | 2.667    | 2.000    | 0.333     |
| 6    | 5.667        | 3.667    | 4.333    | 4.667    | 4.000    | 4.000        | 4.000    | 4.333    | 3.333    | 2.667     |
| 7    | 8.333        | 7.000    | 3.667    | 4.667    | 2.667    | 5.000        | 4.000    | 3.000    | 2.667    | 2.000     |
| 8    | 2.667        | 3.333    | 3.667    | 4.333    | 3.000    | 4.333        | 3.000    | 3.333    | 4.000    | 3.000     |
| Mean | 4.333        | 3.667    | 2.917    | 3.208    | 3.042    | 3.500        | 2.750    | 2.917    | 2.417    | 2.125     |
| SD   | 2.146        | 1.709    | 1.342    | 1.221    | 1.339    | 1.084        | 1.205    | 0.922    | 0.886    | 1.097     |

**WT-EGCG/FA**

|      | <b>Day 1</b> |          |          |          |          | <b>Day 2</b> |          |          |          |           |
|------|--------------|----------|----------|----------|----------|--------------|----------|----------|----------|-----------|
|      | <b>1</b>     | <b>2</b> | <b>3</b> | <b>4</b> | <b>5</b> | <b>6</b>     | <b>7</b> | <b>8</b> | <b>9</b> | <b>10</b> |
| 1    | 2.667        | 3.333    | 4.000    | 2.333    | 1.667    | 3.667        | 4.333    | 3.333    | 4.333    | 1.333     |
| 2    | 3.000        | 3.333    | 0.667    | 4.333    | 1.333    | 4.667        | 2.333    | 3.333    | 1.333    | 1.667     |
| 3    | 3.333        | 2.667    | 0.333    | 0.000    | 0.667    | 1.333        | 1.667    | 0.667    | 1.667    | 2.000     |
| 4    | 2.333        | 7.000    | 4.000    | 3.000    | 2.000    | 6.000        | 4.333    | 5.333    | 3.333    | 4.000     |
| 5    | 6.667        | 4.000    | 3.000    | 1.333    | 2.667    | 3.000        | 2.000    | 2.000    | 0.667    | 2.333     |
| 6    | 7.333        | 2.667    | 4.000    | 2.333    | 3.667    | 2.667        | 5.333    | 1.333    | 4.000    | 2.000     |
| 7    | 3.333        | 5.000    | 6.000    | 3.333    | 3.333    | 5.667        | 1.667    | 2.000    | 2.667    | 5.000     |
| 8    | 6.667        | 2.667    | 1.000    | 2.333    | 3.000    | 4.000        | 3.667    | 3.000    | 1.000    | 1.000     |
| Mean | 4.417        | 3.833    | 2.875    | 2.375    | 2.292    | 3.875        | 3.167    | 2.625    | 2.375    | 2.417     |
| SD   | 2.084        | 1.512    | 2.015    | 1.302    | 1.046    | 1.563        | 1.425    | 1.452    | 1.408    | 1.377     |

**Escape latency (s)**

|      | <b>APP/PS1-V</b> |          | <b>Day 1</b> |          |          | <b>Day 2</b> |          |          |          |           |
|------|------------------|----------|--------------|----------|----------|--------------|----------|----------|----------|-----------|
|      | <b>1</b>         | <b>2</b> | <b>3</b>     | <b>4</b> | <b>5</b> | <b>6</b>     | <b>7</b> | <b>8</b> | <b>9</b> | <b>10</b> |
| 1    | 33.333           | 36.000   | 40.667       | 21.333   | 22.000   | 28.333       | 28.333   | 30.333   | 25.000   | 22.000    |
| 2    | 35.000           | 29.667   | 38.667       | 28.000   | 39.000   | 26.000       | 29.000   | 28.333   | 27.667   | 31.333    |
| 3    | 31.000           | 35.333   | 40.000       | 36.667   | 31.667   | 29.333       | 32.333   | 36.000   | 41.333   | 32.333    |
| 4    | 34.333           | 24.333   | 31.333       | 26.667   | 19.667   | 32.333       | 33.000   | 42.333   | 34.333   | 36.000    |
| 5    | 60.000           | 32.000   | 28.333       | 23.333   | 25.667   | 36.333       | 26.333   | 33.333   | 37.333   | 41.333    |
| 6    | 37.000           | 51.667   | 24.000       | 31.000   | 27.333   | 34.000       | 31.667   | 34.000   | 33.333   | 26.000    |
| 7    | 42.000           | 29.667   | 27.000       | 40.667   | 32.333   | 37.000       | 34.667   | 35.667   | 35.000   | 46.667    |
| 8    | 28.333           | 32.000   | 25.333       | 38.333   | 45.000   | 53.000       | 56.667   | 51.667   | 21.333   | 34.333    |
| Mean | 37.625           | 33.833   | 31.917       | 30.750   | 30.333   | 34.542       | 34.000   | 36.458   | 31.917   | 33.750    |
| SD   | 9.903            | 8.077    | 6.875        | 7.160    | 8.536    | 8.399        | 9.557    | 7.426    | 6.690    | 7.890     |

|      | <b>APP/PS1-EGCG</b> |          | <b>Day 1</b> |          |          | <b>Day 2</b> |          |          |          |           |
|------|---------------------|----------|--------------|----------|----------|--------------|----------|----------|----------|-----------|
|      | <b>1</b>            | <b>2</b> | <b>3</b>     | <b>4</b> | <b>5</b> | <b>6</b>     | <b>7</b> | <b>8</b> | <b>9</b> | <b>10</b> |
| 1    | 16.333              | 8.000    | 12.000       | 13.000   | 18.000   | 25.667       | 19.667   | 18.333   | 34.000   | 13.000    |
| 2    | 45.667              | 50.667   | 16.000       | 18.000   | 8.000    | 19.000       | 19.667   | 11.000   | 4.000    | 4.667     |
| 3    | 21.667              | 34.333   | 18.000       | 16.667   | 12.333   | 49.333       | 36.667   | 43.667   | 27.667   | 27.000    |
| 4    | 48.000              | 43.333   | 51.667       | 40.333   | 20.333   | 55.000       | 46.667   | 21.000   | 21.000   | 8.000     |
| 5    | 35.333              | 29.333   | 21.000       | 30.667   | 30.333   | 29.000       | 16.333   | 37.333   | 25.333   | 27.667    |
| 6    | 23.000              | 18.333   | 38.000       | 18.333   | 9.667    | 18.667       | 13.000   | 8.333    | 14.333   | 14.667    |
| 7    | 41.000              | 17.333   | 20.333       | 27.667   | 31.333   | 19.667       | 25.667   | 30.333   | 18.667   | 10.000    |
| 8    | 41.000              | 26.333   | 15.000       | 33.667   | 18.667   | 12.667       | 29.333   | 11.000   | 11.000   | 26.000    |
| Mean | 34.000              | 28.458   | 24.000       | 24.792   | 18.583   | 28.625       | 25.875   | 22.625   | 19.500   | 16.375    |
| SD   | 12.054              | 14.138   | 13.674       | 9.681    | 8.739    | 15.400       | 11.305   | 13.170   | 9.659    | 9.221     |

|      | <b>APP/PS1-FA</b> |          | <b>Day 1</b> |          |          | <b>Day 2</b> |          |          |          |           |
|------|-------------------|----------|--------------|----------|----------|--------------|----------|----------|----------|-----------|
|      | <b>1</b>          | <b>2</b> | <b>3</b>     | <b>4</b> | <b>5</b> | <b>6</b>     | <b>7</b> | <b>8</b> | <b>9</b> | <b>10</b> |
| 1    | 32.333            | 20.000   | 20.000       | 35.333   | 20.000   | 22.333       | 26.333   | 21.667   | 27.000   | 23.667    |
| 2    | 25.667            | 23.000   | 14.333       | 17.333   | 28.333   | 23.667       | 23.667   | 27.333   | 22.333   | 18.333    |
| 3    | 45.667            | 30.333   | 47.667       | 24.000   | 18.667   | 37.333       | 29.000   | 32.333   | 31.333   | 24.000    |
| 4    | 35.667            | 28.000   | 21.667       | 27.667   | 10.333   | 36.333       | 24.333   | 8.333    | 13.667   | 13.000    |
| 5    | 28.000            | 15.000   | 8.667        | 5.333    | 16.333   | 16.000       | 10.000   | 14.000   | 9.333    | 7.000     |
| 6    | 40.333            | 35.667   | 30.333       | 20.000   | 23.333   | 18.667       | 17.000   | 20.667   | 7.000    | 25.667    |
| 7    | 26.333            | 38.667   | 20.667       | 44.000   | 37.333   | 38.667       | 38.333   | 34.667   | 31.000   | 31.667    |
| 8    | 31.000            | 30.000   | 35.667       | 15.667   | 17.000   | 30.000       | 16.667   | 10.667   | 23.333   | 12.000    |
| Mean | 33.125            | 27.583   | 24.875       | 23.667   | 21.417   | 27.875       | 23.167   | 21.208   | 20.625   | 19.417    |
| SD   | 7.060             | 7.916    | 12.486       | 12.067   | 8.303    | 8.914        | 8.696    | 9.796    | 9.523    | 8.278     |

|      | <b>APP/PS1-EGCG/FA</b> |          | <b>Day 1</b> |          |          | <b>Day 2</b> |          |          |          |           |
|------|------------------------|----------|--------------|----------|----------|--------------|----------|----------|----------|-----------|
|      | <b>1</b>               | <b>2</b> | <b>3</b>     | <b>4</b> | <b>5</b> | <b>6</b>     | <b>7</b> | <b>8</b> | <b>9</b> | <b>10</b> |
| 1    | 10.667                 | 13.000   | 35.333       | 14.333   | 6.667    | 28.667       | 8.667    | 5.667    | 20.000   | 13.333    |
| 2    | 17.333                 | 11.667   | 11.333       | 14.667   | 6.333    | 22.667       | 12.333   | 11.333   | 17.000   | 14.667    |
| 3    | 30.000                 | 11.667   | 11.333       | 11.333   | 10.000   | 18.333       | 10.000   | 19.000   | 27.333   | 16.667    |
| 4    | 25.667                 | 23.000   | 11.667       | 36.333   | 9.333    | 22.333       | 27.333   | 22.333   | 29.333   | 26.000    |
| 5    | 18.333                 | 14.000   | 27.667       | 13.333   | 23.667   | 18.667       | 20.667   | 5.667    | 5.000    | 5.333     |
| 6    | 47.333                 | 43.333   | 36.333       | 17.667   | 26.333   | 21.000       | 29.333   | 26.000   | 7.667    | 22.667    |
| 7    | 53.333                 | 42.000   | 33.667       | 35.000   | 24.333   | 55.667       | 44.333   | 46.333   | 26.333   | 15.667    |
| 8    | 45.333                 | 51.000   | 39.667       | 33.333   | 40.333   | 27.333       | 19.333   | 24.667   | 12.000   | 10.667    |
| Mean | 31.000                 | 26.208   | 25.875       | 22.000   | 18.375   | 26.833       | 21.500   | 20.125   | 18.083   | 15.625    |
| SD   | 15.862                 | 16.536   | 12.408       | 10.844   | 12.206   | 12.222       | 11.971   | 13.328   | 9.271    | 6.492     |

Table S5 (Supporting information of Figure 1D left)

**Escape latency (s)****WT-V**

|      | <b>Day 1</b> |          |          |          |          | <b>Day 2</b> |          |          |          |           |
|------|--------------|----------|----------|----------|----------|--------------|----------|----------|----------|-----------|
|      | <b>1</b>     | <b>2</b> | <b>3</b> | <b>4</b> | <b>5</b> | <b>6</b>     | <b>7</b> | <b>8</b> | <b>9</b> | <b>10</b> |
| 1    | 28.000       | 15.000   | 22.667   | 17.667   | 17.667   | 19.000       | 19.333   | 10.000   | 16.667   | 14.667    |
| 2    | 22.333       | 14.000   | 15.000   | 18.667   | 19.667   | 34.000       | 14.333   | 15.667   | 22.333   | 10.333    |
| 3    | 33.667       | 38.000   | 21.000   | 19.667   | 27.333   | 37.000       | 44.333   | 24.667   | 23.667   | 25.333    |
| 4    | 20.000       | 57.000   | 19.667   | 17.333   | 19.000   | 21.333       | 19.667   | 33.000   | 30.333   | 30.333    |
| 5    | 15.333       | 21.333   | 18.333   | 9.667    | 19.000   | 38.000       | 16.333   | 27.667   | 12.667   | 12.667    |
| 6    | 41.667       | 37.000   | 28.333   | 13.667   | 7.000    | 16.667       | 20.333   | 11.667   | 10.333   | 11.000    |
| 7    | 48.000       | 17.667   | 48.333   | 33.000   | 22.333   | 26.333       | 30.667   | 38.667   | 20.333   | 18.667    |
| 8    | 33.333       | 15.333   | 19.000   | 22.667   | 26.667   | 17.667       | 15.667   | 17.333   | 22.333   | 19.000    |
| Mean | 30.292       | 26.917   | 24.042   | 19.042   | 19.833   | 26.250       | 22.583   | 22.333   | 19.833   | 17.750    |
| SD   | 11.096       | 15.535   | 10.546   | 6.867    | 6.325    | 8.912        | 10.124   | 10.349   | 6.429    | 7.113     |

**WT-EGCG**

|      | <b>Day 1</b> |          |          |          |          | <b>Day 2</b> |          |          |          |           |
|------|--------------|----------|----------|----------|----------|--------------|----------|----------|----------|-----------|
|      | <b>1</b>     | <b>2</b> | <b>3</b> | <b>4</b> | <b>5</b> | <b>6</b>     | <b>7</b> | <b>8</b> | <b>9</b> | <b>10</b> |
| 1    | 26.667       | 21.000   | 18.000   | 33.667   | 14.667   | 36.333       | 24.667   | 22.333   | 17.333   | 24.333    |
| 2    | 30.667       | 44.667   | 20.333   | 22.333   | 22.000   | 20.667       | 28.667   | 17.000   | 23.667   | 18.667    |
| 3    | 46.333       | 32.000   | 46.333   | 24.333   | 28.333   | 34.333       | 44.333   | 39.000   | 34.667   | 42.000    |
| 4    | 23.667       | 27.333   | 23.333   | 31.667   | 27.333   | 35.667       | 27.000   | 27.333   | 11.000   | 21.667    |
| 5    | 32.667       | 17.667   | 15.000   | 14.000   | 20.000   | 17.000       | 18.667   | 17.333   | 11.667   | 7.333     |
| 6    | 26.000       | 25.667   | 22.333   | 14.333   | 22.667   | 26.667       | 16.667   | 14.667   | 18.000   | 11.000    |
| 7    | 26.000       | 19.000   | 9.667    | 15.000   | 11.667   | 21.667       | 15.667   | 16.000   | 9.667    | 13.000    |
| 8    | 33.000       | 14.667   | 12.667   | 28.333   | 27.000   | 21.667       | 19.000   | 20.000   | 23.000   | 11.667    |
| Mean | 30.625       | 25.250   | 20.958   | 22.958   | 21.708   | 26.750       | 24.333   | 21.708   | 18.625   | 18.708    |
| SD   | 7.205        | 9.664    | 11.290   | 7.925    | 6.070    | 7.678        | 9.415    | 8.084    | 8.373    | 11.045    |

**WT-FA**

|      | <b>Day 1</b> |          |          |          |          | <b>Day 2</b> |          |          |          |           |
|------|--------------|----------|----------|----------|----------|--------------|----------|----------|----------|-----------|
|      | <b>1</b>     | <b>2</b> | <b>3</b> | <b>4</b> | <b>5</b> | <b>6</b>     | <b>7</b> | <b>8</b> | <b>9</b> | <b>10</b> |
| 1    | 23.000       | 15.333   | 12.333   | 13.667   | 5.667    | 22.000       | 15.000   | 25.667   | 11.333   | 9.000     |
| 2    | 36.000       | 25.000   | 36.667   | 16.333   | 39.000   | 33.000       | 32.000   | 27.333   | 18.000   | 25.333    |
| 3    | 32.333       | 15.000   | 19.667   | 18.000   | 8.667    | 18.000       | 15.000   | 14.333   | 11.333   | 8.667     |
| 4    | 19.000       | 14.000   | 26.000   | 8.000    | 15.333   | 20.333       | 10.333   | 17.000   | 16.667   | 24.333    |
| 5    | 30.667       | 30.000   | 9.000    | 19.000   | 23.000   | 16.667       | 13.000   | 16.333   | 16.333   | 6.000     |
| 6    | 45.667       | 30.667   | 27.333   | 28.333   | 25.667   | 33.000       | 38.333   | 24.667   | 23.000   | 20.333    |
| 7    | 54.333       | 47.667   | 27.000   | 30.000   | 24.333   | 43.000       | 18.333   | 19.667   | 23.333   | 17.000    |
| 8    | 13.667       | 27.333   | 19.667   | 26.667   | 20.333   | 33.333       | 24.333   | 30.000   | 28.333   | 30.667    |
| Mean | 31.833       | 25.625   | 22.208   | 20.000   | 20.250   | 27.417       | 20.792   | 21.875   | 18.542   | 17.667    |
| SD   | 13.572       | 11.261   | 8.925    | 7.713    | 10.530   | 9.441        | 9.922    | 5.784    | 5.992    | 9.040     |

**WT-EGCG/FA**

|      | <b>Day 1</b> |          |          |          |          | <b>Day 2</b> |          |          |          |           |
|------|--------------|----------|----------|----------|----------|--------------|----------|----------|----------|-----------|
|      | <b>1</b>     | <b>2</b> | <b>3</b> | <b>4</b> | <b>5</b> | <b>6</b>     | <b>7</b> | <b>8</b> | <b>9</b> | <b>10</b> |
| 1    | 23.667       | 24.333   | 20.333   | 23.667   | 15.667   | 26.000       | 35.000   | 21.000   | 36.667   | 8.667     |
| 2    | 27.333       | 21.667   | 10.000   | 25.000   | 9.333    | 27.333       | 20.333   | 22.000   | 10.667   | 11.667    |
| 3    | 23.333       | 17.000   | 9.000    | 8.333    | 10.333   | 12.000       | 12.333   | 7.333    | 9.000    | 11.667    |
| 4    | 21.333       | 39.667   | 24.333   | 15.667   | 17.000   | 38.333       | 34.000   | 36.000   | 21.667   | 33.333    |
| 5    | 42.667       | 25.000   | 19.000   | 14.333   | 21.000   | 21.667       | 9.333    | 14.667   | 10.000   | 19.667    |
| 6    | 41.000       | 20.333   | 26.000   | 26.333   | 26.000   | 16.667       | 27.667   | 17.000   | 28.667   | 12.000    |
| 7    | 29.333       | 28.000   | 45.667   | 22.667   | 29.000   | 41.333       | 12.667   | 17.000   | 18.667   | 35.000    |
| 8    | 35.000       | 18.000   | 12.667   | 16.000   | 23.000   | 23.000       | 23.000   | 30.000   | 10.667   | 10.667    |
| Mean | 30.458       | 24.250   | 20.875   | 19.000   | 18.917   | 25.792       | 21.792   | 20.625   | 18.250   | 17.833    |
| SD   | 8.211        | 7.230    | 11.852   | 6.332    | 7.097    | 9.997        | 9.925    | 8.982    | 10.199   | 10.582    |

**< 25  $\mu\text{m}$**

**APP/PS1-V**

|      | <b>RSC</b> | <b>H</b> | <b>EC</b> |
|------|------------|----------|-----------|
| 1    | 368        | 238      | 301       |
| 2    | 391        | 371      | 257       |
| 3    | 383        | 259      | 247       |
| 4    | 296        | 257      | 249       |
| 5    | 362        | 313      | 331       |
| 6    | 242        | 338      | 397       |
| 7    | 268        | 325      | 316       |
| 8    | 394        | 308      | 403       |
| Mean | 338.000    | 301.125  | 312.625   |
| SD   | 60.150     | 45.836   | 62.358    |

**APP/PS1-EGCG**

|      | <b>RSC</b> | <b>H</b> | <b>EC</b> |
|------|------------|----------|-----------|
| 1    | 193        | 180      | 186       |
| 2    | 226        | 168      | 210       |
| 3    | 189        | 217      | 138       |
| 4    | 222        | 250      | 162       |
| 5    | 251        | 222      | 221       |
| 6    | 204        | 240      | 278       |
| 7    | 235        | 218      | 241       |
| 8    | 285        | 184      | 284       |
| Mean | 225.625    | 209.875  | 215.000   |
| SD   | 31.946     | 29.512   | 52.162    |

**APP/PS1-FA**

|      | <b>RSC</b> | <b>H</b> | <b>EC</b> |
|------|------------|----------|-----------|
| 1    | 284        | 214      | 196       |
| 2    | 181        | 226      | 122       |
| 3    | 237        | 198      | 164       |
| 4    | 257        | 282      | 231       |
| 5    | 261        | 194      | 252       |
| 6    | 223        | 221      | 233       |
| 7    | 290        | 225      | 278       |
| 8    | 293        | 283      | 242       |
| Mean | 253.250    | 230.375  | 214.750   |
| SD   | 38.451     | 34.247   | 51.071    |

**APP/PS1-EGCG/FA**

|      | <b>RSC</b> | <b>H</b> | <b>EC</b> |
|------|------------|----------|-----------|
| 1    | 204        | 167      | 131       |
| 2    | 229        | 158      | 162       |
| 3    | 204        | 152      | 162       |
| 4    | 208        | 178      | 152       |
| 5    | 148        | 198      | 125       |
| 6    | 253        | 165      | 216       |
| 7    | 133        | 166      | 170       |
| 8    | 164        | 158      | 183       |
| Mean | 192.875    | 167.750  | 162.625   |
| SD   | 41.108     | 14.489   | 28.903    |



**25-50  $\mu\text{m}$** **APP/PS1-V**

|      | <b>RSC</b> | <b>H</b> | <b>EC</b> |
|------|------------|----------|-----------|
| 1    | 147        | 105      | 106       |
| 2    | 165        | 112      | 99        |
| 3    | 135        | 123      | 103       |
| 4    | 122        | 96       | 114       |
| 5    | 160        | 106      | 135       |
| 6    | 119        | 130      | 173       |
| 7    | 104        | 96       | 147       |
| 8    | 231        | 142      | 185       |
| Mean | 147.875    | 113.750  | 132.750   |
| SD   | 39.542     | 16.551   | 33.057    |

**APP/PS1-EGCG**

|      | <b>RSC</b> | <b>H</b> | <b>EC</b> |
|------|------------|----------|-----------|
| 1    | 61         | 82       | 83        |
| 2    | 107        | 89       | 91        |
| 3    | 97         | 89       | 77        |
| 4    | 101        | 104      | 72        |
| 5    | 87         | 92       | 93        |
| 6    | 81         | 80       | 98        |
| 7    | 98         | 65       | 103       |
| 8    | 106        | 82       | 100       |
| Mean | 92.250     | 85.375   | 89.625    |
| SD   | 15.443     | 11.237   | 11.237    |

**APP/PS1-FA**

|      | <b>RSC</b> | <b>H</b> | <b>EC</b> |
|------|------------|----------|-----------|
| 1    | 80         | 80       | 69        |
| 2    | 62         | 89       | 72        |
| 3    | 89         | 72       | 66        |
| 4    | 106        | 101      | 80        |
| 5    | 110        | 67       | 94        |
| 6    | 79         | 82       | 96        |
| 7    | 102        | 84       | 81        |
| 8    | 116        | 100      | 102       |
| Mean | 93.000     | 84.375   | 82.500    |
| SD   | 18.555     | 12.082   | 13.459    |

**APP/PS1-EGCG/FA**

|      | <b>RSC</b> | <b>H</b> | <b>EC</b> |
|------|------------|----------|-----------|
| 1    | 83         | 56       | 37        |
| 2    | 77         | 72       | 80        |
| 3    | 83         | 56       | 66        |
| 4    | 58         | 58       | 54        |
| 5    | 50         | 71       | 44        |
| 6    | 58         | 81       | 70        |
| 7    | 59         | 67       | 66        |
| 8    | 54         | 61       | 64        |
| Mean | 65.250     | 65.250   | 60.125    |
| SD   | 13.477     | 9.036    | 14.187    |

**> 50  $\mu$ m**

**APP/PS1-V**

|      | <b>RSC</b> | <b>H</b> | <b>EC</b> |
|------|------------|----------|-----------|
| 1    | 63         | 30       | 29        |
| 2    | 39         | 56       | 52        |
| 3    | 42         | 70       | 38        |
| 4    | 34         | 42       | 30        |
| 5    | 50         | 70       | 45        |
| 6    | 39         | 40       | 51        |
| 7    | 57         | 62       | 56        |
| 8    | 74         | 62       | 54        |
| Mean | 49.750     | 54.000   | 44.375    |
| SD   | 13.916     | 14.928   | 10.783    |

**APP/PS1-EGCG**

|      | <b>RSC</b> | <b>H</b> | <b>EC</b> |
|------|------------|----------|-----------|
| 1    | 27         | 26       | 20        |
| 2    | 21         | 32       | 23        |
| 3    | 20         | 25       | 30        |
| 4    | 38         | 27       | 29        |
| 5    | 33         | 44       | 35        |
| 6    | 28         | 45       | 25        |
| 7    | 30         | 40       | 37        |
| 8    | 43         | 36       | 30        |
| Mean | 30.000     | 34.375   | 28.625    |
| SD   | 7.892      | 8.088    | 5.780     |

**APP/PS1-FA**

|      | <b>RSC</b> | <b>H</b> | <b>EC</b> |
|------|------------|----------|-----------|
| 1    | 29         | 30       | 22        |
| 2    | 25         | 26       | 24        |
| 3    | 31         | 33       | 22        |
| 4    | 29         | 31       | 26        |
| 5    | 34         | 32       | 22        |
| 6    | 25         | 38       | 34        |
| 7    | 33         | 42       | 42        |
| 8    | 44         | 46       | 27        |
| Mean | 31.250     | 34.750   | 27.375    |
| SD   | 6.112      | 6.692    | 7.150     |

**APP/PS1-EGCG/FA**

|      | <b>RSC</b> | <b>H</b> | <b>EC</b> |
|------|------------|----------|-----------|
| 1    | 26         | 21       | 14        |
| 2    | 20         | 21       | 14        |
| 3    | 15         | 29       | 13        |
| 4    | 14         | 27       | 11        |
| 5    | 17         | 22       | 13        |
| 6    | 25         | 29       | 18        |
| 7    | 18         | 21       | 21        |
| 8    | 19         | 23       | 20        |
| Mean | 19.250     | 24.125   | 15.500    |
| SD   | 4.334      | 3.603    | 3.665     |

**APP/PS1-V**

|      | <b>RSC</b> | <b>H</b> | <b>EC</b> |
|------|------------|----------|-----------|
| 1    | 8.4        | 11.0     | 8.2       |
| 2    | 9.4        | 8.6      | 8.8       |
| 3    | 12.8       | 11.0     | 10.6      |
| 4    | 9.4        | 11.2     | 7.6       |
| 5    | 12.2       | 13.6     | 9.8       |
| 6    | 8.8        | 10.2     | 7.8       |
| 7    | 9.0        | 11.2     | 10.8      |
| 8    | 10.6       | 9.4      | 8.2       |
| Mean | 10.075     | 10.775   | 8.975     |
| SD   | 1.635      | 1.483    | 1.262     |

**APP/PS1-EGCG**

|      | <b>RSC</b> | <b>H</b> | <b>EC</b> |
|------|------------|----------|-----------|
| 1    | 7.8        | 8.4      | 6.0       |
| 2    | 6.8        | 8.2      | 6.8       |
| 3    | 6.4        | 8.0      | 5.4       |
| 4    | 6.8        | 9.8      | 6.6       |
| 5    | 6.6        | 9.2      | 5.2       |
| 6    | 8.0        | 8.0      | 6.6       |
| 7    | 6.4        | 8.2      | 6.4       |
| 8    | 8.2        | 10.6     | 7.0       |
| Mean | 7.125      | 8.800    | 6.250     |
| SD   | 0.748      | 0.968    | 0.657     |

**APP/PS1-FA**

|      | <b>RSC</b> | <b>H</b> | <b>EC</b> |
|------|------------|----------|-----------|
| 1    | 6.2        | 8.2      | 6.8       |
| 2    | 7.6        | 7.2      | 5.4       |
| 3    | 6.4        | 10.6     | 7.4       |
| 4    | 8.6        | 9.6      | 6.6       |
| 5    | 7.0        | 8.4      | 5.8       |
| 6    | 8.6        | 10.4     | 7.0       |
| 7    | 6.2        | 8.8      | 7.4       |
| 8    | 7.4        | 8.6      | 6.4       |
| Mean | 7.250      | 8.975    | 6.600     |
| SD   | 0.984      | 1.154    | 0.717     |

**APP/PS1-EGCG/FA**

|      | <b>RSC</b> | <b>H</b> | <b>EC</b> |
|------|------------|----------|-----------|
| 1    | 6.6        | 8.2      | 5.6       |
| 2    | 5.2        | 5.6      | 4.2       |
| 3    | 5.2        | 6.4      | 4.8       |
| 4    | 6.6        | 6.6      | 4.8       |
| 5    | 5.2        | 5.4      | 4.6       |
| 6    | 7.0        | 7.8      | 6.2       |
| 7    | 5.8        | 7.0      | 4.8       |
| 8    | 5.8        | 6.6      | 5.0       |
| Mean | 5.925      | 6.700    | 5.000     |
| SD   | 0.725      | 0.968    | 0.623     |

|                                           |       |       |       |       |       |       |       |       |       |       |
|-------------------------------------------|-------|-------|-------|-------|-------|-------|-------|-------|-------|-------|
| <b>sAPP-<math>\alpha</math>/APP ratio</b> | 1     | 2     | 3     | 4     | 5     | 6     | 7     | 8     | Mean  | SD    |
| <b>APP/PS1-V</b>                          | 0.923 | 0.938 | 0.924 | 0.946 | 0.925 | 0.947 | 0.932 | 0.940 | 0.934 | 0.010 |
| <b>APP/PS1-EGCG</b>                       | 0.993 | 0.998 | 0.991 | 1.002 | 0.994 | 1.001 | 0.994 | 0.988 | 0.995 | 0.005 |
| <b>APP/PS1-FA</b>                         | 0.942 | 0.939 | 0.937 | 0.948 | 0.941 | 0.944 | 0.933 | 0.947 | 0.941 | 0.005 |
| <b>APP/PS1-EGCG/FA</b>                    | 0.998 | 1.000 | 1.003 | 0.993 | 0.995 | 0.996 | 0.992 | 0.996 | 0.997 | 0.004 |
| <b>sAPP-<math>\beta</math>/APP ratio</b>  | 1     | 2     | 3     | 4     | 5     | 6     | 7     | 8     | Mean  | SD    |
| <b>APP/PS1-V</b>                          | 0.964 | 0.959 | 0.966 | 0.947 | 0.960 | 0.958 | 0.964 | 0.951 | 0.959 | 0.007 |
| <b>APP/PS1-EGCG</b>                       | 0.866 | 0.867 | 0.874 | 0.864 | 0.854 | 0.877 | 0.854 | 0.862 | 0.865 | 0.008 |
| <b>APP/PS1-FA</b>                         | 0.756 | 0.777 | 0.765 | 0.754 | 0.779 | 0.752 | 0.771 | 0.754 | 0.764 | 0.011 |
| <b>APP/PS1-EGCG/FA</b>                    | 0.699 | 0.726 | 0.708 | 0.709 | 0.704 | 0.705 | 0.710 | 0.723 | 0.710 | 0.009 |
| <b>P-C99/actin ratio</b>                  | 1     | 2     | 3     | 4     | 5     | 6     | 7     | 8     | Mean  | SD    |
| <b>APP/PS1-V</b>                          | 0.942 | 0.964 | 0.933 | 0.956 | 0.934 | 0.971 | 0.935 | 0.973 | 0.951 | 0.017 |
| <b>APP/PS1-EGCG</b>                       | 0.817 | 0.782 | 0.815 | 0.777 | 0.825 | 0.776 | 0.825 | 0.771 | 0.799 | 0.024 |
| <b>APP/PS1-FA</b>                         | 0.832 | 0.777 | 0.834 | 0.774 | 0.820 | 0.784 | 0.825 | 0.774 | 0.803 | 0.027 |
| <b>APP/PS1-EGCG/FA</b>                    | 0.726 | 0.567 | 0.722 | 0.569 | 0.718 | 0.560 | 0.725 | 0.569 | 0.644 | 0.084 |
| <b>C99/actin ratio</b>                    | 1     | 2     | 3     | 4     | 5     | 6     | 7     | 8     | Mean  | SD    |
| <b>APP/PS1-V</b>                          | 0.940 | 0.962 | 0.930 | 0.953 | 0.931 | 0.955 | 0.933 | 0.958 | 0.945 | 0.013 |
| <b>APP/PS1-EGCG</b>                       | 0.812 | 0.777 | 0.815 | 0.772 | 0.815 | 0.771 | 0.824 | 0.766 | 0.794 | 0.025 |
| <b>APP/PS1-FA</b>                         | 0.833 | 0.773 | 0.825 | 0.770 | 0.825 | 0.780 | 0.799 | 0.770 | 0.797 | 0.027 |
| <b>APP/PS1-EGCG/FA</b>                    | 0.721 | 0.557 | 0.716 | 0.559 | 0.713 | 0.555 | 0.719 | 0.564 | 0.638 | 0.085 |

Table S11 (Supporting information of Figure 5B-D)

|                                    |       |       |       |       |       |       |       |       |       |       |
|------------------------------------|-------|-------|-------|-------|-------|-------|-------|-------|-------|-------|
| <b>pADAM10 (upper)/actin ratio</b> | 1     | 2     | 3     | 4     | 5     | 6     | 7     | 8     | Mean  | SD    |
| <b>APP/PS1-V</b>                   | 0.627 | 0.538 | 0.627 | 0.535 | 0.624 | 0.534 | 0.623 | 0.535 | 0.581 | 0.048 |
| <b>APP/PS1-EGCG</b>                | 0.915 | 0.964 | 0.913 | 0.963 | 0.923 | 0.962 | 0.911 | 0.962 | 0.939 | 0.025 |
| <b>APP/PS1-FA</b>                  | 0.351 | 0.612 | 0.355 | 0.610 | 0.349 | 0.618 | 0.349 | 0.611 | 0.482 | 0.140 |
| <b>APP/PS1-EGCG/FA</b>             | 0.843 | 0.946 | 0.844 | 0.937 | 0.842 | 0.938 | 0.846 | 0.945 | 0.893 | 0.052 |
| <b>pADAM10 (lower)/actin ratio</b> | 1     | 2     | 3     | 4     | 5     | 6     | 7     | 8     | Mean  | SD    |
| <b>APP/PS1-V</b>                   | 0.783 | 0.742 | 0.778 | 0.744 | 0.786 | 0.744 | 0.787 | 0.743 | 0.763 | 0.022 |
| <b>APP/PS1-EGCG</b>                | 0.983 | 1.019 | 0.981 | 1.019 | 0.979 | 1.016 | 0.981 | 1.016 | 0.999 | 0.019 |
| <b>APP/PS1-FA</b>                  | 0.677 | 0.796 | 0.677 | 0.796 | 0.677 | 0.788 | 0.677 | 0.793 | 0.735 | 0.062 |
| <b>APP/PS1-EGCG/FA</b>             | 0.974 | 1.002 | 0.972 | 1.004 | 0.970 | 1.006 | 0.967 | 1.000 | 0.987 | 0.017 |
| <b>mADAM10 (upper)/actin ratio</b> | 1     | 2     | 3     | 4     | 5     | 6     | 7     | 8     | Mean  | SD    |
| <b>APP/PS1-V</b>                   | 0.984 | 0.966 | 0.985 | 0.966 | 0.987 | 0.965 | 0.986 | 0.968 | 0.976 | 0.010 |
| <b>APP/PS1-EGCG</b>                | 1.049 | 1.043 | 1.053 | 1.048 | 1.050 | 1.048 | 1.052 | 1.046 | 1.049 | 0.003 |
| <b>APP/PS1-FA</b>                  | 0.987 | 0.982 | 0.987 | 0.980 | 0.984 | 0.979 | 0.989 | 0.981 | 0.984 | 0.004 |
| <b>APP/PS1-EGCG/FA</b>             | 1.053 | 1.062 | 1.053 | 1.064 | 1.048 | 1.062 | 1.049 | 1.058 | 1.056 | 0.006 |
| <b>mADAM10 (lower)/actin ratio</b> | 1     | 2     | 3     | 4     | 5     | 6     | 7     | 8     | Mean  | SD    |
| <b>APP/PS1-V</b>                   | 0.850 | 0.862 | 0.850 | 0.861 | 0.850 | 0.859 | 0.851 | 0.861 | 0.856 | 0.006 |
| <b>APP/PS1-EGCG</b>                | 0.966 | 0.936 | 0.966 | 0.935 | 0.958 | 0.939 | 0.981 | 0.938 | 0.952 | 0.017 |
| <b>APP/PS1-FA</b>                  | 0.863 | 0.803 | 0.866 | 0.802 | 0.866 | 0.797 | 0.864 | 0.795 | 0.832 | 0.035 |
| <b>APP/PS1-EGCG/FA</b>             | 1.010 | 0.975 | 1.007 | 0.971 | 1.009 | 0.974 | 1.011 | 0.974 | 0.991 | 0.019 |
| <b>BACE1/actin ratio</b>           | 1     | 2     | 3     | 4     | 5     | 6     | 7     | 8     | Mean  | SD    |
| <b>APP/PS1-V</b>                   | 1.012 | 1.027 | 1.013 | 1.025 | 1.011 | 1.023 | 1.012 | 1.022 | 1.018 | 0.007 |
| <b>APP/PS1-EGCG</b>                | 0.979 | 1.001 | 0.978 | 0.999 | 0.977 | 0.997 | 0.975 | 1.000 | 0.988 | 0.012 |
| <b>APP/PS1-FA</b>                  | 0.963 | 0.985 | 0.963 | 0.987 | 0.962 | 0.982 | 0.967 | 0.992 | 0.975 | 0.012 |
| <b>APP/PS1-EGCG/FA</b>             | 0.952 | 0.922 | 0.951 | 0.920 | 0.950 | 0.924 | 0.951 | 0.918 | 0.936 | 0.016 |

Table S12 (Supporting information of Figure 6B-D)

| <b>APP/PS1-V</b> |                                |                               | <b>APP/PS1-EGCG</b> |                                |                               | <b>WT-EGCG</b> |                                |                               | <b>WT-FA</b> |                                |                               |
|------------------|--------------------------------|-------------------------------|---------------------|--------------------------------|-------------------------------|----------------|--------------------------------|-------------------------------|--------------|--------------------------------|-------------------------------|
|                  | <b>TNF-<math>\alpha</math></b> | <b>IL-1<math>\beta</math></b> |                     | <b>TNF-<math>\alpha</math></b> | <b>IL-1<math>\beta</math></b> |                | <b>TNF-<math>\alpha</math></b> | <b>IL-1<math>\beta</math></b> |              | <b>TNF-<math>\alpha</math></b> | <b>IL-1<math>\beta</math></b> |
| 1                | 2.956                          | 2.737                         | 1                   | 1.879                          | 1.906                         | 1              | 1.447                          | 1.041                         | 1            | 1.199                          | 1.188                         |
| 2                | 2.696                          | 2.087                         | 2                   | 1.286                          | 1.717                         | 2              | 1.142                          | 0.968                         | 2            | 0.759                          | 1.030                         |
| 3                | 2.367                          | 2.648                         | 3                   | 1.406                          | 2.012                         | 3              | 0.344                          | 0.578                         | 3            | 1.490                          | 0.831                         |
| 4                | 2.259                          | 2.441                         | 4                   | 1.461                          | 1.859                         | 4              | 1.297                          | 1.306                         | 4            | 0.888                          | 0.962                         |
| 5                | 1.930                          | 2.205                         | 5                   | 2.073                          | 1.174                         | 5              | 0.921                          | 0.655                         | 5            | 0.572                          | 0.971                         |
| 6                | 2.097                          | 3.126                         | 6                   | 2.188                          | 1.365                         | 6              | 1.320                          | 0.995                         | 6            | 0.971                          | 0.693                         |
| 7                | 2.489                          | 2.379                         | 7                   | 2.144                          | 1.813                         | 7              | 0.571                          | 1.007                         | 7            | 1.080                          | 1.517                         |
| 8                | 2.692                          | 2.708                         | 8                   | 1.959                          | 2.367                         | 8              | 1.014                          | 1.596                         | 8            | 0.847                          | 0.403                         |
| Mean             | 2.436                          | 2.541                         | Mean                | 1.800                          | 1.777                         | Mean           | 1.007                          | 1.018                         | Mean         | 0.976                          | 0.949                         |
| SD               | 0.341                          | 0.333                         | SD                  | 0.360                          | 0.371                         | SD             | 0.384                          | 0.326                         | SD           | 0.283                          | 0.330                         |

  

| <b>APP/PS1-FA</b> |                                |                               | <b>APP/PS1-EGCG/FA</b> |                                |                               | <b>WT-EGCG/FA</b> |                                |                               |
|-------------------|--------------------------------|-------------------------------|------------------------|--------------------------------|-------------------------------|-------------------|--------------------------------|-------------------------------|
|                   | <b>TNF-<math>\alpha</math></b> | <b>IL-1<math>\beta</math></b> |                        | <b>TNF-<math>\alpha</math></b> | <b>IL-1<math>\beta</math></b> |                   | <b>TNF-<math>\alpha</math></b> | <b>IL-1<math>\beta</math></b> |
| 1                 | 1.811                          | 1.721                         | 1                      | 0.912                          | 1.170                         | 1                 | 0.779                          | 0.907                         |
| 2                 | 1.158                          | 1.484                         | 2                      | 1.489                          | 1.533                         | 2                 | 0.622                          | 0.671                         |
| 3                 | 2.122                          | 1.990                         | 3                      | 0.710                          | 1.303                         | 3                 | 0.634                          | 0.922                         |
| 4                 | 2.541                          | 1.891                         | 4                      | 1.835                          | 0.836                         | 4                 | 1.451                          | 1.206                         |
| 5                 | 1.728                          | 2.505                         | 5                      | 1.283                          | 1.608                         | 5                 | 1.311                          | 1.176                         |
| 6                 | 1.893                          | 2.241                         | 6                      | 1.203                          | 0.983                         | 6                 | 0.772                          | 0.595                         |
| 7                 | 2.063                          | 1.365                         | 7                      | 1.435                          | 1.634                         | 7                 | 1.116                          | 0.870                         |
| 8                 | 1.547                          | 1.513                         | 8                      | 0.983                          | 0.611                         | 8                 | 1.046                          | 1.533                         |
| Mean              | 1.858                          | 1.839                         | Mean                   | 1.231                          | 1.210                         | Mean              | 0.966                          | 0.985                         |
| SD                | 0.411                          | 0.397                         | SD                     | 0.361                          | 0.378                         | SD                | 0.313                          | 0.307                         |

  

| <b>APP/PS1-V</b> |             |             | <b>APP/PS1-EGCG</b> |             |             | <b>WT-EGCG</b> |             |             | <b>WT-FA</b> |             |             |
|------------------|-------------|-------------|---------------------|-------------|-------------|----------------|-------------|-------------|--------------|-------------|-------------|
|                  | <b>SOD1</b> | <b>GPx1</b> |                     | <b>SOD1</b> | <b>GPx1</b> |                | <b>SOD1</b> | <b>GPx1</b> |              | <b>SOD1</b> | <b>GPx1</b> |
| 1                | 1.592       | 1.684       | 1                   | 1.541       | 1.652       | 1              | 1.059       | 1.203       | 1            | 1.060       | 1.138       |
| 2                | 1.680       | 1.798       | 2                   | 1.224       | 1.447       | 2              | 0.751       | 0.780       | 2            | 1.099       | 1.164       |
| 3                | 1.401       | 1.706       | 3                   | 1.486       | 1.170       | 3              | 0.913       | 0.998       | 3            | 0.806       | 1.362       |
| 4                | 1.953       | 1.894       | 4                   | 1.083       | 1.552       | 4              | 1.025       | 0.975       | 4            | 1.004       | 0.982       |
| 5                | 1.062       | 1.318       | 5                   | 1.092       | 1.252       | 5              | 1.138       | 1.035       | 5            | 1.135       | 0.920       |
| 6                | 1.745       | 1.798       | 6                   | 1.097       | 1.177       | 6              | 1.018       | 1.060       | 6            | 1.055       | 1.009       |
| 7                | 1.478       | 1.595       | 7                   | 1.147       | 1.277       | 7              | 1.036       | 1.055       | 7            | 1.089       | 1.147       |
| 8                | 1.438       | 1.845       | 8                   | 1.280       | 1.200       | 8              | 0.989       | 0.960       | 8            | 0.933       | 0.723       |
| Mean             | 1.544       | 1.705       | Mean                | 1.244       | 1.341       | Mean           | 0.991       | 1.008       | Mean         | 1.023       | 1.056       |
| SD               | 0.266       | 0.183       | SD                  | 0.181       | 0.185       | SD             | 0.116       | 0.119       | SD           | 0.107       | 0.192       |

  

| <b>APP/PS1-FA</b> |             |             | <b>APP/PS1-EGCG/FA</b> |             |             | <b>WT-EGCG/FA</b> |             |             |
|-------------------|-------------|-------------|------------------------|-------------|-------------|-------------------|-------------|-------------|
|                   | <b>SOD1</b> | <b>GPx1</b> |                        | <b>SOD1</b> | <b>GPx1</b> |                   | <b>SOD1</b> | <b>GPx1</b> |
| 1                 | 1.314       | 1.644       | 1                      | 0.789       | 1.004       | 1                 | 0.949       | 0.689       |
| 2                 | 1.004       | 1.195       | 2                      | 0.879       | 1.223       | 2                 | 1.156       | 0.794       |
| 3                 | 1.100       | 1.322       | 3                      | 1.099       | 0.999       | 3                 | 1.045       | 1.132       |
| 4                 | 1.081       | 1.291       | 4                      | 1.066       | 0.939       | 4                 | 1.196       | 1.153       |
| 5                 | 1.461       | 1.412       | 5                      | 0.923       | 0.901       | 5                 | 0.972       | 1.087       |
| 6                 | 1.246       | 1.428       | 6                      | 0.932       | 1.016       | 6                 | 0.879       | 1.013       |
| 7                 | 1.354       | 1.201       | 7                      | 1.026       | 1.208       | 7                 | 0.810       | 1.003       |
| 8                 | 1.545       | 1.142       | 8                      | 1.068       | 1.133       | 8                 | 0.960       | 1.359       |
| Mean              | 1.263       | 1.329       | Mean                   | 0.973       | 1.053       | Mean              | 0.996       | 1.029       |
| SD                | 0.192       | 0.163       | SD                     | 0.109       | 0.121       | SD                | 0.131       | 0.210       |

Table S13 (Supporting information of Figure 9A and B)

| <b>SOD1/actin ratio</b> | 1     | 2     | 3     | 4     | 5     | 6     | 7     | 8     | Mean  | SD    |
|-------------------------|-------|-------|-------|-------|-------|-------|-------|-------|-------|-------|
| <b>APP/PS1-V</b>        | 0.960 | 0.963 | 0.966 | 0.969 | 0.950 | 0.957 | 0.951 | 0.959 | 0.959 | 0.007 |
| <b>APP/PS1-EGCG</b>     | 0.876 | 0.877 | 0.883 | 0.890 | 0.885 | 0.886 | 0.889 | 0.893 | 0.885 | 0.006 |
| <b>APP/PS1-FA</b>       | 0.877 | 0.881 | 0.874 | 0.870 | 0.887 | 0.888 | 0.883 | 0.875 | 0.879 | 0.006 |
| <b>APP/PS1-EGCG/FA</b>  | 0.773 | 0.763 | 0.771 | 0.751 | 0.778 | 0.759 | 0.776 | 0.758 | 0.766 | 0.010 |
| <b>GPx1/actin ratio</b> | 1     | 2     | 3     | 4     | 5     | 6     | 7     | 8     | Mean  | SD    |
| <b>APP/PS1-V</b>        | 0.961 | 0.965 | 0.964 | 0.965 | 0.968 | 0.968 | 0.967 | 0.969 | 0.966 | 0.003 |
| <b>APP/PS1-EGCG</b>     | 0.921 | 0.923 | 0.918 | 0.920 | 0.912 | 0.910 | 0.919 | 0.910 | 0.917 | 0.005 |
| <b>APP/PS1-FA</b>       | 0.930 | 0.918 | 0.930 | 0.917 | 0.928 | 0.924 | 0.927 | 0.918 | 0.924 | 0.005 |
| <b>APP/PS1-EGCG/FA</b>  | 0.865 | 0.853 | 0.869 | 0.848 | 0.871 | 0.849 | 0.865 | 0.859 | 0.860 | 0.009 |

Table S14 (Supporting information of Figure 9D and E)

| <b>APP/PS1-V</b> |            |           | <b>APP/PS1-EGCG</b> |            |           |
|------------------|------------|-----------|---------------------|------------|-----------|
|                  | <b>CA1</b> | <b>EC</b> |                     | <b>CA1</b> | <b>EC</b> |
| 1                | 125.502    | 127.880   | 1                   | 129.117    | 130.512   |
| 2                | 125.221    | 126.229   | 2                   | 129.414    | 130.276   |
| 3                | 125.275    | 126.294   | 3                   | 129.015    | 129.928   |
| 4                | 126.673    | 126.729   | 4                   | 128.615    | 129.273   |
| 5                | 127.323    | 127.767   | 5                   | 128.125    | 128.544   |
| 6                | 124.746    | 127.000   | 6                   | 128.052    | 129.564   |
| 7                | 126.546    | 125.177   | 7                   | 130.110    | 130.663   |
| 8                | 124.478    | 127.506   | 8                   | 130.354    | 131.760   |
| Mean             | 125.721    | 126.823   | Mean                | 129.100    | 130.065   |
| SD               | 1.010      | 0.915     | SD                  | 0.844      | 0.977     |

  

| <b>APP/PS1-FA</b> |            |           | <b>APP/PS1-EGCG/FA</b> |            |           |
|-------------------|------------|-----------|------------------------|------------|-----------|
|                   | <b>CA1</b> | <b>EC</b> |                        | <b>CA1</b> | <b>EC</b> |
| 1                 | 128.303    | 130.515   | 1                      | 131.713    | 132.766   |
| 2                 | 129.158    | 128.522   | 2                      | 129.491    | 130.671   |
| 3                 | 128.801    | 130.079   | 3                      | 130.521    | 130.860   |
| 4                 | 128.619    | 129.885   | 4                      | 129.423    | 131.856   |
| 5                 | 129.486    | 131.063   | 5                      | 129.886    | 130.744   |
| 6                 | 129.077    | 129.406   | 6                      | 131.020    | 130.619   |
| 7                 | 127.220    | 129.191   | 7                      | 131.927    | 133.000   |
| 8                 | 129.798    | 129.645   | 8                      | 131.563    | 133.342   |
| Mean              | 128.808    | 129.788   | Mean                   | 130.693    | 131.732   |
| SD                | 0.797      | 0.790     | SD                     | 1.012      | 1.158     |
